# Supplementary material for: The atherogenic index of plasma and the risk of mortality in incident dialysis patients: Results from a nationwide prospective cohort in Korea
Source: PubMed Central journal article supplement (PMC5446226; doi:10.1371/journal.pone.0177499), 2017-05-26
Supplement: pone.0177499.s002.pdf [file pone.0177499.s002.pdf]

**S1 Table. Comparison of baseline characteristics and outcomes between finally analyzed patients (n=1,174) and excluded patients (n=533)**

|                                     | Finally analyzed patients<br>(n=1,174) | Excluded patients<br>(n=533) | P      |
|-------------------------------------|----------------------------------------|------------------------------|--------|
| <b>Age, years</b>                   | 55.4 ± 14.2                            | 55.1 ± 13.8                  | 0.73   |
| <b>Men, n (%)</b>                   | 721 (61.4%)                            | 329 (61.7%)                  | 0.9    |
| <b>Hemodialysis, n (%)</b>          | 740 (63.0%)                            | 342 (64.2%)                  | 0.29   |
| <b>Primary renal disease, n (%)</b> |                                        |                              | <0.001 |
| Diabetic nephropathy                | 599 (51.0%)                            | 251 (47.1%)                  |        |
| Hypertensive nephrosclerosis        | 209 (17.8%)                            | 61 (11.4%)                   |        |
| Glomerulonephritis                  | 168 (14.3%)                            | 75 (14.1%)                   |        |
| Polycystic kidney disease           | 23 (2.0%)                              | 8 (1.5%)                     |        |
| <sup>a</sup> Others                 | 38 (3.2%)                              | 10 (1.9%)                    |        |
| Unknown                             | 137 (11.7%)                            | 128 (24.0%)                  |        |
| <b>Comorbid disease, n (%)</b>      |                                        |                              |        |
| Diabetes mellitus                   | 661 (55.3%)                            | 275 (51.6%)                  | 0.07   |
| <sup>b</sup> CVD                    | 373 (31.8%)                            | 162 (30.4%)                  | 0.61   |
| <b>Smoker, n (%)</b>                | 544 (46.3%)                            | 239 (44.8%)                  | 0.60   |
| <b>SBP, mmHg</b>                    | 141.8 ± 22.5                           | 140.9 ± 20.4                 | 0.89   |
| <b>DBP, mmHg</b>                    | 78.2 ± 13.7                            | 79.8 ± 12.5                  | 0.18   |
| <b>BMI, kg/m<sup>2</sup></b>        | 22.9 ± 3.3                             | 23.0 ± 3.3                   | 0.72   |
| <b>Hemoglobin, g/L</b>              | 88 ± 16                                | 89 ± 17                      | 0.15   |
| <b>BUN, mmol/L</b>                  | 29.8 ± 13.4                            | 29.5 ± 13.9                  | 0.64   |
| <b>Creatinine, μmol/L</b>           | 769 ± 362                              | 743 ± 327                    | 0.19   |
| <b>Albumin, g/L</b>                 | 33 ± 6                                 | 34 ± 6                       | 0.33   |
| <b>Glucose, mmol/L</b>              | 7.7 ± 4.1                              | 7.6 ± 4.0                    | 0.43   |
| <b>Calcium, mmol/L</b>              | 2.0 ± 0.3                              | 2.0 ± 0.3                    | 0.18   |
| <b>Phosphorus, mmol/L</b>           | 1.8 ± 0.6                              | 1.8 ± 0.6                    | 0.20   |

|                                    |             |             |      |
|------------------------------------|-------------|-------------|------|
| <b>Follow-up duration, months</b>  | 33.2 ± 18.2 | 33.5 ± 17.2 | 0.80 |
| <b>Death, n (%)</b>                | 170 (14.5%) | 66 (12.4%)  | 0.26 |
| <b>Cardiovascular death, n (%)</b> | 55 (4.7%)   | 24 (4.5%)   | 0.9  |

---

*Note:* Data are expressed as the mean ± standard deviation or number of patients (percent).

<sup>a</sup>Others: Interstitial nephritis, obstructive uropathy, and post status of nephrectomy

<sup>b</sup>CVD: A composite of coronary artery disease, peripheral artery disease, cerebrovascular accident, and congestive heart failure.

*Abbreviations:* BMI, body mass index; BUN, blood urea nitrogen; CVD, cardiovascular disease; DBP, diastolic blood pressure; SBP, systolic blood pressure.
