# Supplementary material for: The atherogenic index of plasma and the risk of mortality in incident dialysis patients: Results from a nationwide prospective cohort in Korea
Source: PubMed Central journal article supplement (PMC5446226; doi:10.1371/journal.pone.0177499), 2017-05-26
Supplement: pone.0177499.s003.pdf [file pone.0177499.s003.pdf]

**S2 Table. Multivariate Cox regression analysis of AIP categories for all-cause and cardiovascular mortality including adjustment of serum calcium and phosphorus concentrations**

| Variable                           | All-cause mortality | Cardiovascular mortality |
|------------------------------------|---------------------|--------------------------|
|                                    | HR (95% CI)         | HR (95% CI)              |
| Age, year                          | 1.04 (1.03-1.06)    | 1.05 (1.02-1.07)         |
| Women (versus men)                 | 0.85 (0.61-1.19)    | 0.81 (0.45-1.47)         |
| Diabetes mellitus                  | 1.21 (0.85-1.72)    | 1.90 (0.95-3.81)         |
| <sup>a</sup> Previous CVD          | 1.65 (1.20-2.28)    | 1.59 (0.90-2.79)         |
| PD (versus HD)                     | 0.75 (0.53-1.06)    | 0.71 (0.38-1.34)         |
| BMI, per kg/m <sup>2</sup>         | 0.96 (0.91-1.01)    | 0.93 (0.85-1.02)         |
| Albumin, per 0.1 g/L               | 0.56 (0.41-0.75)    | 0.46 (0.27-0.76)         |
| Log hs-CRP, per mg/L               | 1.28 (1.05-1.56)    | 1.43 (1.01-2.04)         |
| Residual urine volume, per 0.1 L/d | 0.99 (0.96-1.02)    | 0.98 (0.94-1.03)         |
| <b>Calcium</b>                     |                     |                          |
| <8.5 mg/dl                         | 0.44 (0.23-0.84)    | 0.37 (0.11-1.33)         |
| 8.5 to <9.0 mg/dl                  | 0.56 (0.27-1.16)    | 0.48 (0.12-1.93)         |
| 9.0 to <9.5 mg/dl                  | Reference           | Reference                |
| 9.5 to <10.2 mg/dl                 | 1.25 (0.43-3.60)    | 0.53 (0.05-0.57)         |
| ≥10.2 mg/dl                        | 0.45 (0.06-3.60)    | -                        |
| <b>Phosphorus</b>                  |                     |                          |
| <4.5 mg/dl                         | 0.99 (0.99-1.50)    | 1.48 (0.67-3.27)         |
| 4.5 to <5.4 mg/dl                  | Reference           | Reference                |
| 5.4 to <6.4 mg/dl                  | 1.27 (0.82-1.98)    | 2.46 (1.10-5.52)         |
| ≥6.4 mg/dl                         | 0.80 (0.49-1.28)    | 0.91 (0.35-2.39)         |
| <b>AIP categories</b>              |                     |                          |
| Quintile 1                         | 1.79 (1.03-3.11)    | 1.80 (0.68-4.75)         |
| Quintile 2                         | 1.67 (0.97-2.88)    | 1.16 (0.43-3.18)         |
| Quintile 3                         | Reference           | Reference                |
| Quintile 4                         | 1.71 (0.99-2.95)    | 1.91 (0.74-4.91)         |
| Quintile 5                         | 2.00 (1.17-3.43)    | 2.55 (1.03-6.30)         |

<sup>a</sup>CVD: A composite of coronary artery disease, peripheral artery disease, cerebrovascular accident, and congestive heart failure.

*Abbreviations:* AIP, atherogenic index of plasma; BMI, body mass index; CVD, cardiovascular disease; DBP, diastolic blood pressure; HD, hemodialysis; hs-CRP, high-sensitivity C-reactive protein; PD, peritoneal dialysis; SBP, systolic blood pressure.
